# Supplementary material
Source: Royal Society of Chemistry journal article supplement (https://www.rsc.org/suppdata/dt/1999/3063/903694f.doc)
Supplement: Supplementary file 1 [file 903694f.doc]

Synthesis, X-ray and Solid State NMR Studies on Silver(I) Silanethiolates. Crystal Structure of bis{tri-o-tolylsilanethiolato(tri­phenylphosphine)silver(I)}bis(toluene), [{(*o*‑CH3C6H4)3SiSAg(PPh3)}2](CH3C6H5)2

**J. Chojnackia, B. Becker*a, A. Konitza, M. J. Potrzebowskib and W. Wojnowskia**

a *Technical University of Gdansk, Department of Chemistry, G. Narutowicz Str.11/12*, *80-952 Gdańsk, Poland*

b *Center of Molecular & Macromolecular Studies, Polish Academy of Sciences, Sienkiewicz Str. 112, 90‑363 Lódz, Poland*

#### Supplementary material

**Preparation of [(ButO)3SiSAg(PPh3)2], 1**

### Starting materials

Complex silver(I) compounds: Ag(PPh3)4NO3 , Ag2Br2(PPh3)4 and [{AgI(PPh3)}4] were prepared following the procedures described in[[1]](#endnote-2), [[2]](#endnote-3) and [[3]](#endnote-4), respectively.

**Method A**

To a solution of 1.22 g of Ag(PPh3)4NO3 in 30 ml of acetonitrile / benzene (5:1) 280 mg of tri-*tert*-butoxysilanethiol in 4 ml of benzene was added. The contents were allowed to react for 15 minutes, washed with 0.1 M NaOH solution and water, filtered, and upon solvent removal, recrystallized from acetonitrile. The product (0.455g) melts at 135 °C, Rf=0.39. Silver content: found 10.8%, C48H57AgO3P2SSi requires: 11.8%. There was some triphenylphosphine identified (m.p. 80°C) in the crystallization liquor.

**Method B**

To a solution of 1.42 g of Ag2Br2(PPh3)4 in 15 ml of benzene a solution of 560 mg of tri-*tert*-butoxysilanethiol and 202 mg of Et3N dissolved in 5 ml of benzene was added. The solution was heated to boiling; the silver complex disappeared whereas some „silk-like” suspension of Et3N·HBr was formed. Deposit was filtered out and solvent removal gave 1.92 g of crude product (m.p. 162°C). Recrystallization from propanol-2 yielded 0.92g of **1,** m.p. 135°C; Rf=0.39, silica gel plates - Silufol (Kavalier), mobile phase: hexane-benzene 4:1 (v/v), developers: iodine vapors or hydrogen sulfide.

**Method C**

[{AgI(PPh3)}4] (0.994 g) was dissolved in 20 ml of benzene under reflux and a solution of 2 mmoles of tri-*tert*-butoxysilanethiol and 2 mmoles of Et3N in 5 ml of benzene was added. The suspension becomes clear after half an hour. Then 5 ml of hexane was added and the deposit formed was filtered out. Crude product obtained by solvent removal (0.42g) was recrystallized from mixture of hexane: ethanol (7:5) yielding again **1**. There was some amount of substrate in the crude product.

**Method D**

Tri-*tert*-butoxysilanethiol (280 mg) and triphenylphosphine (850 mg) were dissolved in 10 ml of chloroform. Silver nitrate (170 mg) and 272 mg of CH3COONa·3H2O were added to 20 ml of water. Both phases were placed in a separation funnel and shaken for 20 minutes. The organic phase after separation was dried with MgSO4 and CHCl3 was evaporated. Crude product was recrystallized from the hexane-ethanol mixture yielding 0.74g of **1**.

Single crystals of **1** suitable for diffraction measurements were obtained by recrystallization from octane solution to which a few drops of chloroform were added.

1. F.A. Cotton, M. Goodgame, *J. Chem. Soc.*, **1960**, 5267 [↑](#endnote-ref-2)
2. B.K. Teo, J.C. Calabrese, *J. Chem. Soc., Chem. Comm.*, **1976**, 185 [↑](#endnote-ref-3)
3. B.K. Teo, J.C. Calabrese, *J. Am. Chem. Soc.*, 1975, **97**, 1256 [↑](#endnote-ref-4)
